# Supplementary material
Source: PubMed Central journal article supplement (PMC3309745)
Supplement: 1110666109_pnas.201110666SI.pdf [file 1110666109_pnas.201110666SI.pdf]

# Supporting Information

Chinchore et al. 10.1073/pnas.1110666109

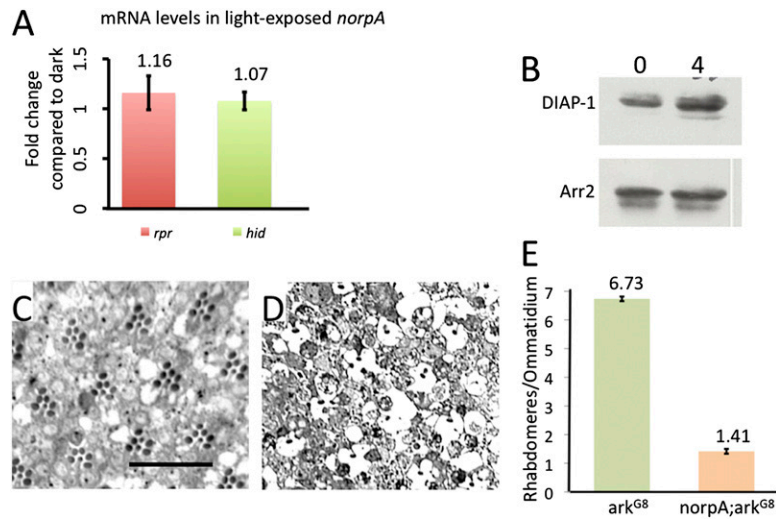

**Fig. S1.** Regulators of developmental PCD are not engaged during *norpA* degeneration. (A) Real-time quantitative RT-PCR data depicting *rpr* and *hid* transcript levels in 2-d light-exposed *norpA* flies compared with flies raised in darkness. (B) Immunoblot analysis to assess the steady-state level of DIAP-1 protein in dark-raised (0) and 4-d light-exposed (4) *norpA* retina. Photoreceptor-specific protein Arrestin-2 (Arr-2) serves as a loading control. Cross-sections (0.5 μm) of retinas from *norpA*<sup>+</sup>; *ark*<sup>G8</sup> (C) or *norpA*; *ark*<sup>G8</sup> (D) flies treated with 7 d of light. The *w*<sup>-</sup> area of the retina corresponding to the *ark*<sup>G8</sup> clones is depicted. (Scale bar, 20 μm.) Genotypes are *w norpA<sup>EE5</sup>eyFLP/w; FRT42D ark<sup>G8</sup>/FRT42 w<sup>+</sup> cl-R11* (C) and *w norpA<sup>EE5</sup>eyFLP/w; FRT42D ark<sup>G8</sup>/FRT42 w<sup>+</sup> cl-R11* (D). (E) Ratio of the total number of discernable rhabdomeres to the total number of ommatidia in *norpA*<sup>+</sup> *ark*<sup>G8</sup> and *norpA* *ark*<sup>G8</sup> flies. The *w*<sup>-</sup> clones corresponding to *ark*<sup>G8</sup> photoreceptors were counted. The ratio for *norpA*<sup>+</sup> *ark*<sup>G8</sup> was 6.73 ± 0.08 (55 ommatidia, *n* = 4 flies), and the ratio for *norpA* *ark*<sup>G8</sup> was 1.41 ± 0.08 (101 ommatidia, *n* = 5 flies). Data are the mean ± SEM.

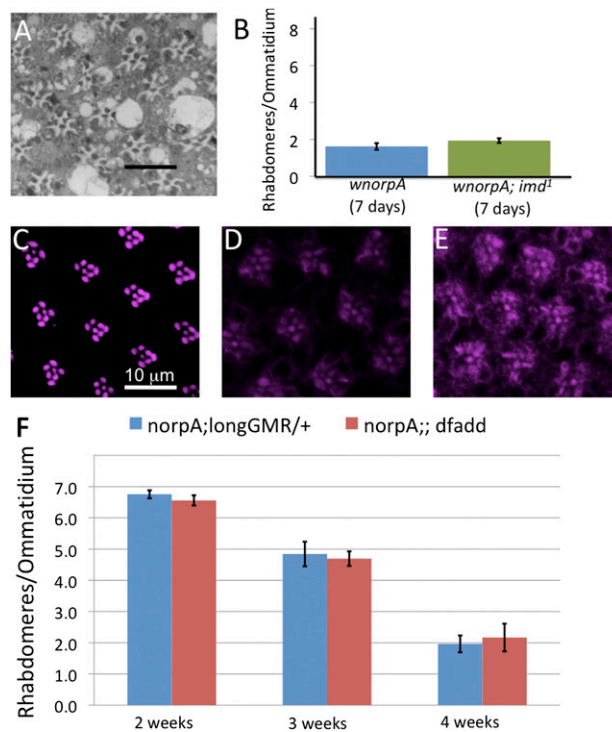

**Fig. S2.** Photoreceptor cell death in *norpA* is independent of known upstream activators of Dredd. (A) Cross-sections of retinas from *norpA; imd<sup>1</sup>* flies exposed to 7 d of light. (Scale bar, 10  $\mu\text{m}$ .) (B) Quantitation of rhabdomeres/ommatidium of *norpA imd<sup>1</sup>* flies at 7 d of light exposure and compared with *norpA* controls exposed for a similar time. The ratio for *norpA; imd* was  $2.17 \pm 0.12$  (183 ommatidia, 4 flies). The *norpA; dfadd<sup>102804</sup>* flies were exposed to light for 2 wk (C), 3 wk (D), and 4 wk (E), and retinas were isolated for whole-mount staining for Actin. (F) Quantitation of rhabdomeres/ommatidium for *norpA dfadd* double mutants at the indicated time points. *norpA; LGMR-GAL4/+* flies are used as a control because they are similarly pigmented. The ratios for *norpA; LGMR/+* (2 wk),  $6.8 \pm 0.1$  (76 ommatidia, 3 flies); for *norpA; LGMR/+* (3 wk),  $4.8 \pm 0.4$  (73 ommatidia, 4 flies); for *norpA; LGMR/+* (4 wk),  $2.0 \pm 0.3$  (106 ommatidia, 4 flies); for *norpA; dfadd* (2 wk),  $6.6 \pm 0.2$  (46 ommatidia, 2 flies), for *norpA; dfadd* (3 wk),  $4.7 \pm 0.2$  (62 ommatidia, 3 flies), and for *norpA; dfadd* (4 wk),  $2.2 \pm 0.4$  (106 ommatidia, 5 flies) are shown. Data are the mean  $\pm$  SEM.

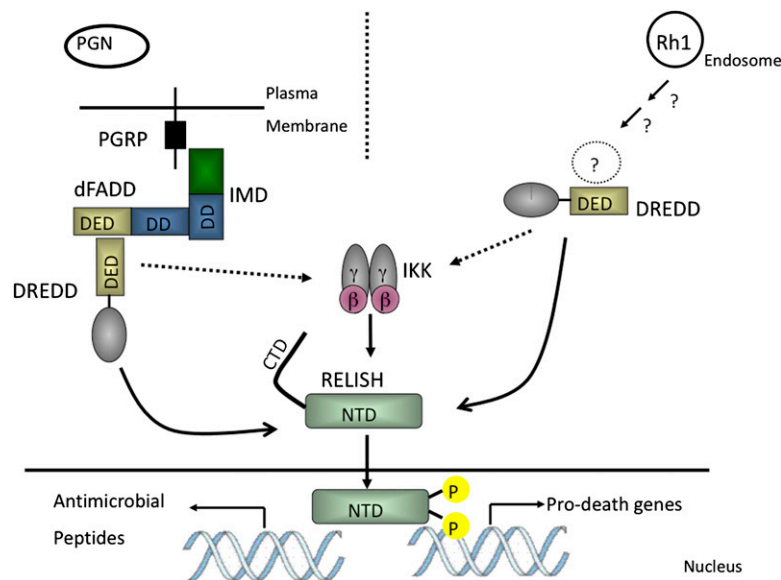

**Fig. S3.** Relish activation in photoreceptor cell death and the immune response. During the immune response, Dredd activates Relish. Dredd activation depends on Imd and dFadd proteins. In *norpA* photoreceptors, Rh1 accumulation in endosomes activates Dredd by an unknown mechanism. This leads to activation of Relish, which mediates transcription of genes that trigger death in photoreceptors. DD, death domain; DED, death effector domain; PGN, peptidoglycan; PGRP, peptidoglycan receptor protein.

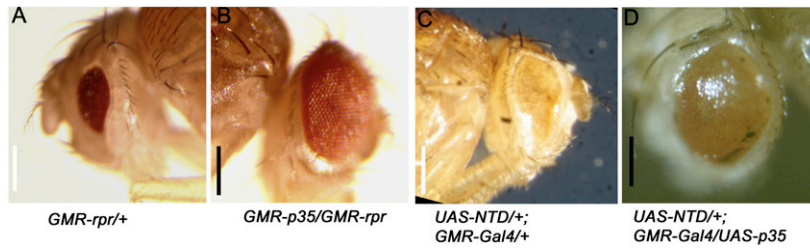

**Fig. S4.** (A) Eye ablation induced after ectopic expression of *rpr* from one copy of *GMR-rpr* transgene. (B) The *rpr*-induced eye ablation is rescued by expression of p35 from one copy of *GMR-p35* transgene. (C) Eye phenotype of a fly expressing Relish NTD from one copy of the transgene. Reduced eye curvature, glazed appearance, aberrant pigmentation is apparent. (D) Overexpression of p35 from a UAS transgene does not rescue the phenotype induced by Relish NTD. (Scale bars, 150  $\mu\text{m}$ .)
